# Supplementary material for: Multi-omics differentially classify disease state and treatment outcome in pediatric Crohn’s disease
Source: Microbiome. 2018 Jan 15;6:13. doi: 10.1186/s40168-018-0398-3 (PMC5769311; doi:10.1186/s40168-018-0398-3)
Supplement: Supplementary file 3 — Each dataset’s classification accuracy (XLSX 65 kb) [file 40168_2018_398_MOESM3_ESM.xlsx]

## Sheet: disease
Sequencing	Dataset	# Features	mtry	LOOCV Accuracy	Model OOB error	Median random OOB error	P-value
16S	Genus	63	7	0.842105	0.157895	0.526316	< 1/1000
16S	Phylum	7	2	0.789474	0.210526	0.526316	< 1/1000
16S	Species	76	8	0.763158	0.236842	0.526316	0.001
16S	Order	20	4	0.736842	0.210526	0.526316	0.001
16S	# OTUs	1	-	0.711	-	-	0.009
16S	Class	14	3	0.710526	0.289474	0.526316	0.008
16S	Family	38	6	0.710526	0.289474	0.526316	0.007
16S	KO	4676	68	0.684211	0.368421	0.526316	0.043
MGS	Strain	27	5	0.684211	0.315789	0.526316	0.016
MGS	Class	9	3	0.657895	0.368421	0.526316	0.052
MGS	Family	17	4	0.657895	0.342105	0.526316	0.029
MGS	Genus	22	4	0.657895	0.342105	0.526316	0.038
MGS	Module	214	14	0.657895	0.342105	0.526316	0.03
MGS	Phylum	6	2	0.657895	0.342105	0.526316	0.027
16S	Pathway	254	15	0.631579	0.368421	0.526316	0.056
MGS	GRS	1	-	0.625	-	-	0.008
MGS	Order	11	3	0.605263	0.394737	0.526316	0.089
MGS	Species	36	6	0.605263	0.421053	0.526316	0.13
MGS	KO	2548	50	0.578947	0.5	0.552632	0.295
16S	OTU	552	23	0.552632	0.421053	0.526316	0.118
MGS	Pathway	107	10	0.552632	0.473684	0.526316	0.247

## Sheet: response
Sequencing	Dataset	# Features	mtry	LOOCV Accuracy	Model OOB error	Median random OOB error	P-value
16S	Genus	56	7	0.777778	0.222222	0.555556	0.008
16S	Class	13	3	0.722222	0.277778	0.555556	0.027
16S	Family	35	5	0.722222	0.277778	0.555556	0.021
16S	Order	18	4	0.722222	0.277778	0.555556	0.02
MGS	Genus	20	4	0.722222	0.277778	0.555556	0.013
MGS	Strain	22	4	0.722222	0.277778	0.555556	0.029
MGS	Pathway	104	10	0.722222	0.277778	0.555556	0.018
16S	OTU	432	20	0.666667	0.333333	0.555556	0.053
MGS	Class	7	2	0.666667	0.333333	0.555556	0.042
MGS	Phylum	5	2	0.666667	0.333333	0.555556	0.055
MGS	Module	209	14	0.611111	0.388889	0.555556	0.092
MGS	Species	28	5	0.611111	0.388889	0.555556	0.119
16S	Phylum	6	2	0.555556	0.388889	0.555556	0.117
MGS	KO	2534	50	0.555556	0.333333	0.555556	0.034
16S	Pathway	251	15	0.444444	0.611111	0.555556	0.613
MGS	Family	14	3	0.444444	0.555556	0.555556	0.441
16S	KO	4527	67	0.388889	0.666667	0.555556	0.732
MGS	Order	8	2	0.388889	0.555556	0.555556	0.471
16S	Species	65	8	0.333333	0.666667	0.555556	0.693
